# Supplementary material for: Co2SnO4nanoparticles as a high performance catalyst for oxidative degradation of rhodamine B dye and pentachlorophenol by activation of peroxymonosulfate
Source: Royal Society of Chemistry journal article supplement (doi:10.1039/c6cp08576h), 2017-01-01
Supplement: c6cp08576h1.pdf [file c6cp08576h1.pdf]

**Co<sub>2</sub>SnO<sub>4</sub> nanoparticles as high performance catalyst for oxidative degradation of Rhodamine B dye and pentachlorophenol by activation of peroxymonosulfate**

Monaam Ben Ali,<sup>1,2,3</sup> Alexandre Barras,<sup>1</sup> Ahmed Addad,<sup>4</sup> Brigitte Sieber,<sup>4</sup> Habib

Elhouichet,<sup>2,3</sup> Mokhtar Férid,<sup>2</sup> Sabine Szunerits<sup>1</sup> and Rabah Boukherroub<sup>1\*</sup>

<sup>1</sup>*Univ. Lille, CNRS, Centrale Lille, ISEN, Univ. Valenciennes, UMR 8520 - IEMN, F-59000  
Lille, France*

<sup>2</sup>*Laboratoire de Physico-Chimie des Matériaux Minéraux et leurs Applications, Centre  
National de Recherches en Sciences des Matériaux, B.P. 95 Hammam-Lif, 2050, Tunisia*

<sup>3</sup>*Département de Physique, Faculté des Sciences de Tunis, Université Tunis-El Manar 2092,  
Tunisia*

<sup>4</sup>*UMET, UMR CNRS 8207, Université Lille 1, 59655 Villeneuve d'Ascq Cédex, France*

### **Catalytic activity of Co(II) and Sn(IV)**

The catalytic activity of Co(II) and Sn(IV) for the degradation of RhB dye was evaluated in an aqueous solution. The degradation reaction was carried out in a spectrometric quartz cuvette. 10  $\mu\text{L}$  of  $\text{CoCl}_2$  catalyst (5  $\mu\text{M}$ ) was added into 2 mL aqueous solution of RhB (12.5  $\mu\text{M}$ ) under constant stirring. The suspension was continuously stirred for about 30 min to reach an adsorption-desorption equilibrium between RhB dye and catalyst under dark conditions. Then, 2.4  $\mu\text{L}$  of peroxymonosulfate (PMS) (0.3 mM) was added to the stable aqueous dye solution under constant stirring. The concentration of RhB was determined using UV-vis spectrophotometry by monitoring the changes in the absorbance maximum at 554 nm.

Similarly, the performance of Sn(IV) for PMS activation was investigated under the same experimental conditions. 10  $\mu\text{L}$  of  $\text{SnCl}_4 \cdot 5\text{H}_2\text{O}$  catalyst (5  $\mu\text{M}$ ) was added into 2 mL aqueous solution of RhB (12.5  $\mu\text{M}$ ) under constant stirring. The suspension was continuously stirred for about 30 min to reach an adsorption-desorption equilibrium between RhB dye and catalyst under dark conditions. Then, 2.4  $\mu\text{L}$  of peroxymonosulfate (PMS) (0.3 mM) was added to the stable aqueous dye solution under constant stirring. The concentration of RhB was determined using UV-vis spectrophotometry by monitoring the changes in the absorbance maximum at 554 nm.

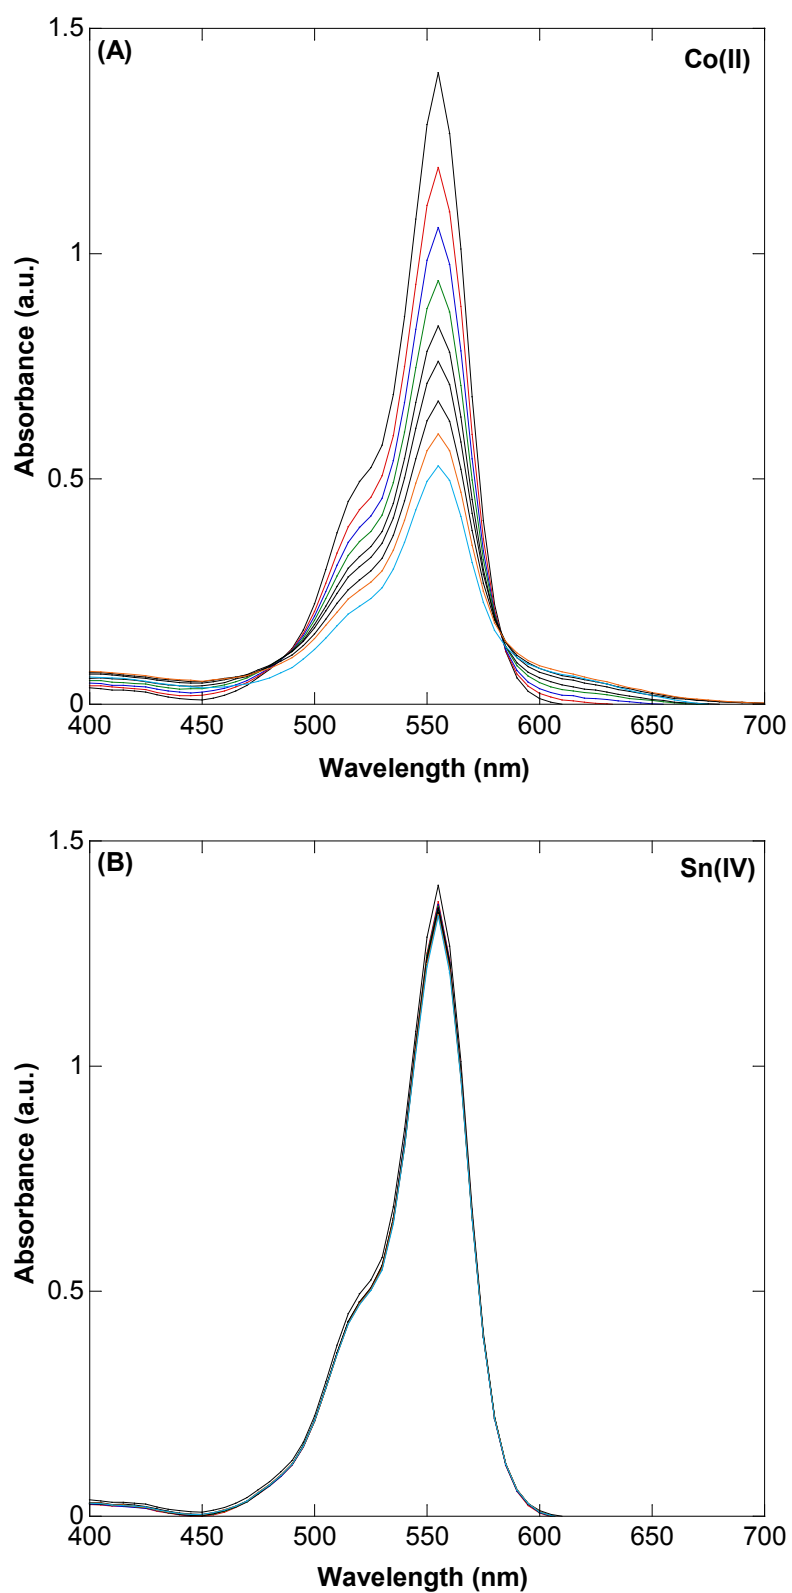

**Figure S1.** UV-vis absorbance spectra of catalytic degradation of RhB (12.5  $\mu\text{M}$ ) using 0.5  $\mu\text{M}$  of  $\text{CoCl}_2$  (A) and 0.5  $\mu\text{M}$  of  $\text{SnCl}_4 \cdot 5\text{H}_2\text{O}$  (B) in the presence of 0.3 mM of PMS.

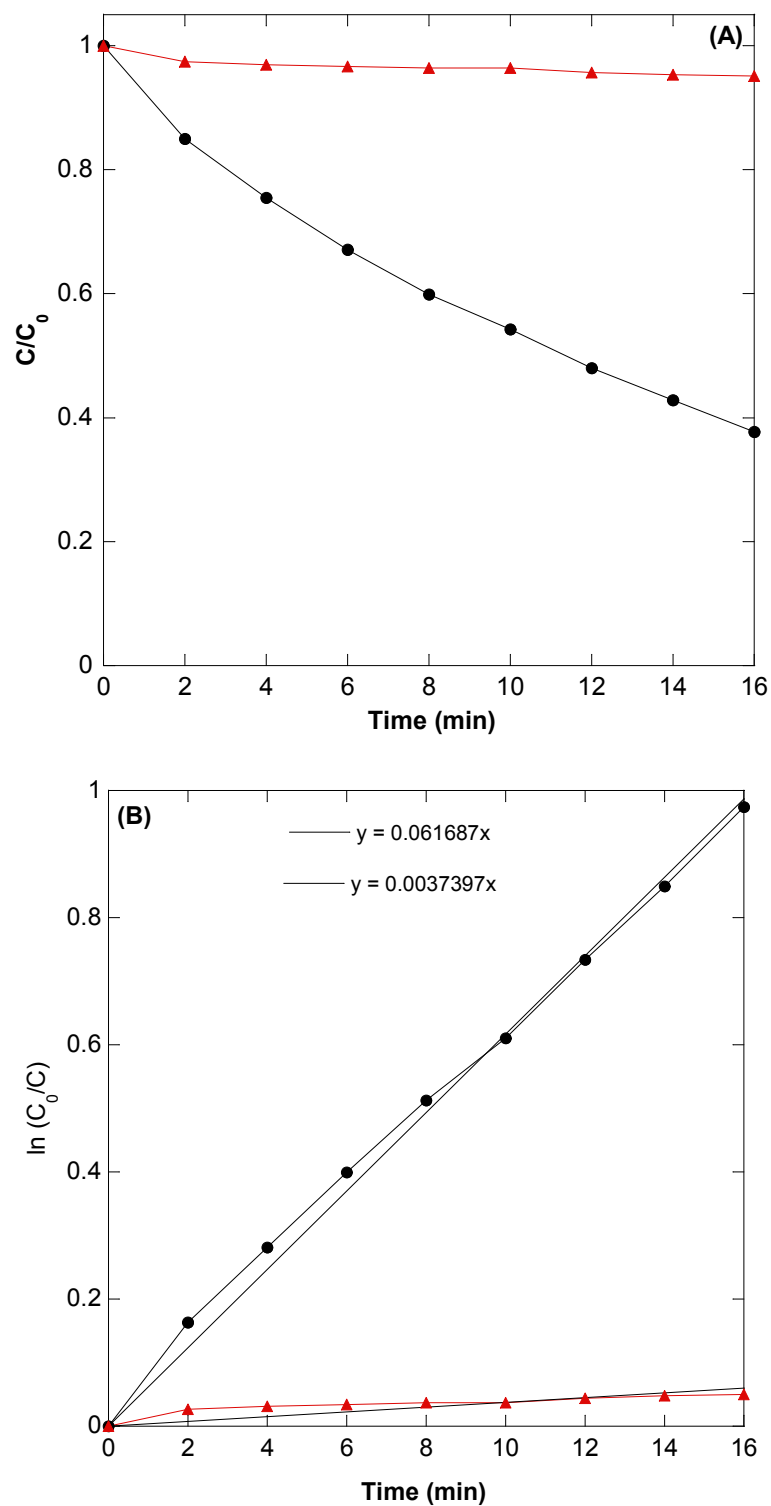

**Figure S2.** (A) Temporal course of the catalytic degradation of RhB (12.5 μM), (B) degradation kinetics with first order linearity of  $\ln(C_0/C) = kt$  using 0.5 μM of  $\text{CoCl}_2$  and 0.5 μM of  $\text{SnCl}_4 \cdot 5\text{H}_2\text{O}$  in the presence of 0.3 mM of PMS.
